# Supplementary material for: Quantification of the Time Course of CYP3A Inhibition, Activation, and Induction Using a Population Pharmacokinetic Model of Microdosed Midazolam Continuous Infusion
Source: PubMed Central journal article supplement — Clin Pharmacokinet. 2022 Oct 4;61(11):1595–607. doi: 10.1007/s40262-022-01175-6 (PMC9652212; doi:10.1007/s40262-022-01175-6), 2022-10-04
Supplement: 40262_2022_1175_MOESM1_ESM.pdf [file 40262_2022_1175_MOESM1_ESM.pdf]

**Quantification of the time course of CYP3A inhibition, activation, and induction using a population pharmacokinetic model of microdosed midazolam continuous infusion**

Yomna M Nassar\* (1,2), Nicolas Hohmann\* (3), Robin Michelet (1), Katharina Gottwalt (3), Andreas D Meid (3), Jürgen Burhenne (3), Wilhelm Huisinga (4), Walter E Haefeli (3), Gerd Mikus# (1,3), Charlotte Kloft# (1)

1. *Department of Clinical Pharmacy and Biochemistry, Institute of Pharmacy, Freie Universität Berlin, Germany*
2. *Graduate Research Training Program PharMetrX, Freie Universität Berlin/University of Potsdam, Germany*
3. *Department of Clinical Pharmacology and Pharmacoepidemiology, University of Heidelberg, Heidelberg, Germany*
4. *Institute of Mathematics, University of Potsdam, Potsdam, Germany*

\* shared first authorship, # shared last authorship

**Corresponding author**

Charlotte Kloft

Department of Clinical Pharmacy and Biochemistry, Institute of Pharmacy, Freie Universität Berlin.

Kelchstr. 31, 12169 Berlin, Germany.

Telephone: +49 30 838 50676

Email: charlotte.kloft@fu-berlin.de

**Table S1** Individual midazolam pharmacokinetic parameters after 3 µg bolus dose (bolus period)

| ID                 | Pharmacokinetic parameter [unit] |                  |                               |                  |                       |          |                 |
|--------------------|----------------------------------|------------------|-------------------------------|------------------|-----------------------|----------|-----------------|
|                    | $C_{max}$<br>[pg/mL]             | $T_{max}$<br>[h] | $AUC_{0-\infty}$<br>[pg·h/mL] | $T_{1/2}$<br>[h] | Clearance<br>[mL/min] | V<br>[L] | $V_{ss}$<br>[L] |
| 1                  | 130                              | 0.0333           | 110                           | 2.36             | 456                   | 93.2     | 66.3            |
| 2                  | 132                              | 0.0333           | 98.3                          | 2.48             | 509                   | 109      | 77.1            |
| 3                  | 134                              | 0.0333           | 103                           | 1.68             | 485                   | 70.3     | 61.8            |
| 4                  | 72.9                             | 0.0333           | 83.5                          | 2.01             | 599                   | 104      | 69.4            |
| 5                  | 74.3                             | 0.0333           | 68.3                          | 1.71             | 732                   | 109      | 86.0            |
| 6                  | 136                              | 0.0333           | 86.8                          | 2.31             | 576                   | 115      | 83.3            |
| 7                  | 307                              | 0.0833           | 123                           | 1.71             | 405                   | 60.0     | 49.4            |
| 8                  | 88.4                             | 0.0333           | 141                           | 1.98             | 354                   | 60.5     | 50.8            |
| 9                  | 112                              | 0.0333           | 91.1                          | 2.43             | 549                   | 115      | 73.3            |
| 10                 | 417                              | 0.0333           | 147                           | 2.55             | 340                   | 75.1     | 49.0            |
| 11                 | 131                              | 0.0333           | 127                           | 2.11             | 393                   | 71.8     | 53.6            |
| 12                 | 247                              | 0.0333           | 116                           | 1.83             | 429                   | 68.0     | 50.2            |
| 13                 | 126                              | 0.0333           | 148                           | 1.64             | 337                   | 47.8     | 40.9            |
| 14                 | 79.4                             | 0.0333           | 68.6                          | 1.88             | 729                   | 118      | 81.1            |
| 15                 | 219                              | 0.0333           | 114                           | 1.82             | 440                   | 69.3     | 43.6            |
| 16                 | 80.1                             | 0.0333           | 92.1                          | 1.75             | 543                   | 82.0     | 64.5            |
| 17                 | 101                              | 0.0333           | 97.2                          | 2.51             | 514                   | 112      | 88.9            |
| 18                 | 91.1                             | 0.0333           | 125                           | 1.87             | 399                   | 64.5     | 62.8            |
| 19                 | 106                              | 0.0333           | 109                           | 2.22             | 457                   | 87.7     | 66.5            |
| 20                 | 153                              | 0.0333           | 122                           | 2.28             | 411                   | 81.2     | 55.2            |
| 21                 | 129                              | 0.0333           | 128                           | 2.18             | 391                   | 73.9     | 51.1            |
| 22                 | 135                              | 0.0333           | 133                           | 2.35             | 375                   | 76.5     | 65.8            |
| 23                 | 122                              | 0.0333           | 105                           | 1.73             | 476                   | 71.3     | 64.6            |
| 24                 | 85.0                             | 0.0333           | 102                           | 2.73             | 492                   | 116      | 91.8            |
| Mean               |                                  |                  | 110                           | 2.09             | 475                   | 85.5     | 64.5            |
| Standard deviation |                                  |                  | 21.8                          | 0.32             | 104.8                 | 21.1     | 14.4            |
| %CV                |                                  |                  | 19.8                          | 15.4             | 22.1                  | 24.7     | 22.3            |

Noncompartmental analysis calculated by Kinetica 5.0

$AUC_{0-\infty}$  Area under the curve from time zero to infinity;  $C_{max}$  Maximum concentration; CV Coefficient of variability;  $T_{max}$  Time of maximum concentration; V volume of distribution;  $V_{ss}$  Volume of distribution at steady state

**Table S2** Calculated midazolam dosing for period two (perpetrator period)

| ID                 | Calculated midazolam dose for perpetrator period |                         |
|--------------------|--------------------------------------------------|-------------------------|
|                    | Bolus dose<br>[µg]                               | Infusion rate<br>[µg/h] |
| 1                  | 4.40                                             | 2.80                    |
| 2                  | 5.10                                             | 3.10                    |
| 3                  | 4.10                                             | 2.90                    |
| 4                  | 4.60                                             | 3.60                    |
| 5                  | 5.70                                             | 4.40                    |
| 6                  | 5.60                                             | 3.50                    |
| 7                  | 3.30                                             | 2.40                    |
| 8                  | 3.40                                             | 2.10                    |
| 9                  | 4.90                                             | 3.30                    |
| 10                 | 3.40                                             | 2.10                    |
| 11                 | 3.60                                             | 2.40                    |
| 12                 | 3.30                                             | 2.60                    |
| 13                 | 2.70                                             | 2.00                    |
| 14                 | 5.40                                             | 4.40                    |
| 15                 | 2.90                                             | 2.70                    |
| 16                 | 4.30                                             | 3.30                    |
| 17                 | 5.90                                             | 3.10                    |
| 18                 | 4.20                                             | 2.40                    |
| 19                 | 4.40                                             | 2.70                    |
| 20                 | 3.70                                             | 2.50                    |
| 21                 | 3.40                                             | 2.30                    |
| 22                 | 4.40                                             | 2.30                    |
| 23                 | 4.30                                             | 2.90                    |
| 24                 | 6.10                                             | 3.00                    |
| Mean               | 4.30                                             | 2.87                    |
| Standard deviation | 0.97                                             | 0.65                    |
| %CV                | 22.6                                             | 22.6                    |

CV Coefficient of variability

**Table S3** Individuals' demographics (n=24; 12 males, 12 females)

| <b>Variable</b>          | <b>Mean</b> | <b>Median</b> | <b>SD</b> | <b>CV%</b> | <b>Range</b> |
|--------------------------|-------------|---------------|-----------|------------|--------------|
| Age [years]              | 29.6        | 27.0          | 7.55      | 25.5       | 22.0–54.0    |
| Height [m]               | 1.73        | 1.73          | 0.0846    | 4.90       | 1.59–1.90    |
| Weight [kg]              | 71.3        | 69.3          | 11.09     | 15.6       | 55.3–90.5    |
| BMI [kg/m <sup>2</sup> ] | 23.9        | 23.7          | 2.70      | 11.3       | 19.6–29.9    |

*BMI* Body mass index, *CV* coefficient of variation, *SD* standard deviation

**Table S4** Results of covariate analysis: Estimated midazolam clearance per time interval and perpetrator type

| Study arm                | Time interval<br>(time relative to perpetrator administration [h]) | Clearance [L/h] | Absolute change in clearance compared to placebo arm [L/h] | Relative change in clearance compared to placebo arm (%) |
|--------------------------|--------------------------------------------------------------------|-----------------|------------------------------------------------------------|----------------------------------------------------------|
| Placebo <sup>a</sup>     |                                                                    | 43.9            | n.a.                                                       | n.a.                                                     |
| Oral voriconazole        | [0, 1]                                                             | 26.4            | -17.5                                                      | -39.9                                                    |
|                          | (1, 2]                                                             | 31.2            | -12.7                                                      | -29.0                                                    |
|                          | (2, 3]                                                             | 33.5            | -10.4                                                      | -23.8                                                    |
|                          | (3, 4]                                                             | 29.9            | -14.0                                                      | -31.9                                                    |
|                          | (4, 5]                                                             | 15.8            | -28.1                                                      | -63.9                                                    |
|                          | (5, 6]                                                             | 20.2            | -23.7                                                      | -54.0                                                    |
|                          | (6, 7]                                                             | 12.9            | -30.9                                                      | -70.6                                                    |
|                          | (7, 8]                                                             | 13.4            | -30.4                                                      | -69.4                                                    |
| Intravenous voriconazole | [0, 1]                                                             | 36.6            | -7.26                                                      | -16.6                                                    |
|                          | (1, 3]                                                             | 39.0            | -4.88                                                      | -11.1                                                    |
|                          | (3, 4]                                                             | 37.2            | -6.67                                                      | -15.2                                                    |
|                          | (4, 5]                                                             | 27.9            | -15.9                                                      | -36.4                                                    |
|                          | (5, 6]                                                             | 26.7            | -17.2                                                      | -39.3                                                    |
|                          | (6, 7]                                                             | 17.1            | -26.8                                                      | -61.1                                                    |
|                          | (7, 8]                                                             | 18.3            | -25.6                                                      | -58.3                                                    |
| Oral efavirenz           | [0, 2]                                                             | 50.5            | 6.60                                                       | 15.0                                                     |
|                          | (2, 3]                                                             | 69.8            | 25.9                                                       | 59.1                                                     |
|                          | (3, 4]                                                             | 68.5            | 24.6                                                       | 56.0                                                     |
|                          | (4, 5]                                                             | 56.4            | 12.5                                                       | 28.5                                                     |
|                          | (5, 6]                                                             | 58.5            | 14.6                                                       | 33.3                                                     |
|                          |                                                                    |                 |                                                            |                                                          |
| Oral rifampicin          | [22, 24]                                                           | 56.1            | 12.3                                                       | 27.9                                                     |
|                          | (24, 26]                                                           | 51.6            | 7.74                                                       | 17.6                                                     |
|                          | (26, 28]                                                           | 54.3            | 10.4                                                       | 23.7                                                     |
|                          | (28, 30]                                                           | 64.4            | 20.5                                                       | 46.7                                                     |
|                          | (30, 34]                                                           | 48.4            | 4.49                                                       | 10.2                                                     |

n.a. not applicable

<sup>a</sup> Represents clearance value in placebo arms, at -2–0 h prior to perpetrator administration, and the time intervals of efavirenz (6, 8] h and rifampicin [0, 22) h.

Red colored rows represent time intervals of **maximum change** in midazolam clearance per perpetrator arm.

Shaded grey rows represent the first time interval at which midazolam clearance significantly deviated beyond the boundary of 80%–125%. Grey boxes include all time intervals outside the bioequivalence limit.
