# Supplementary material for: Quantification of the Time Course of CYP3A Inhibition, Activation, and Induction Using a Population Pharmacokinetic Model of Microdosed Midazolam Continuous Infusion
Source: PubMed Central journal article supplement — Clin Pharmacokinet. 2022 Oct 4;61(11):1595–607. doi: 10.1007/s40262-022-01175-6 (PMC9652212; doi:10.1007/s40262-022-01175-6), 2022-10-04
Supplement: 40262_2022_1175_MOESM4_ESM.pdf [file 40262_2022_1175_MOESM4_ESM.pdf]

**Quantification of the time course of CYP3A inhibition, activation, and induction using a population pharmacokinetic model of microdosed midazolam continuous infusion**

Yomna M Nassar\* (1,2), Nicolas Hohmann\* (3), Robin Michelet (1), Katharina Gottwalt (3), Andreas D Meid (3), Jürgen Burhenne (3), Wilhelm Huisinga (4), Walter E Haefeli (3), Gerd Mikus# (1,3), Charlotte Kloft# (1)

1. *Department of Clinical Pharmacy and Biochemistry, Institute of Pharmacy, Freie Universität Berlin, Germany*
2. *Graduate Research Training Program PharMetrX, Freie Universität Berlin/University of Potsdam, Germany*
3. *Department of Clinical Pharmacology and Pharmacoepidemiology, University of Heidelberg, Heidelberg, Germany*
4. *Institute of Mathematics, University of Potsdam, Potsdam, Germany*

\* shared first authorship, #shared last authorship

**Corresponding author**

Charlotte Kloft

Department of Clinical Pharmacy and Biochemistry, Institute of Pharmacy, Freie Universität Berlin.

Kelchstr. 31, 12169 Berlin, Germany.

Telephone: +49 30 838 50676

Email: charlotte.kloft@fu-berlin.de

**NONMEM code of the joint midazolam and 1'-hydroxymidazolam population pharmacokinetic model**

```
$INPUT      ID           ;individual number
            SEX
            AGE
            HT           ;height [m]
            WT           ;weight [kg]
            BMI          ;body mass index [kg/m2]
            TIME
            TINF         ;time of midazolam infusion [h]
            RATE         ;rate of midazolam infusion [ug/h]
            AMT          ;amount of midazolam administered [ug]
            ADM          ;order of administration
            EVID
            MDV
            DV
            DVTYPE       ;type of analyte
            CMT          ;compartment identifier
            FLAGMED      ;flag according to perpetrator

$SUBROUTINES ADVAN6 TOL=3

$MODEL      NCOMP=2
COMP=(CENTRAL,DEFOBS) ;COMPARTMENT FOR MDZ
COMP=(METAB)          ;COMPARTMENT FOR 1'-OH-MDZ

$PK
;-----
; Covariate impact: Time here is relative to midazolam administration
;-----
;Placebo/no perpetrator
IF(TIME.LT.2.OR.FLAGMED.EQ.1) CLFLAGMED = 1 ;placebo

;[A] Efavirenz
IF(TIME.GT.2.AND.TIME.LE.4.AND.FLAGMED.EQ.2) CLFLAGMED = ( 1 + THETA(6))
IF(TIME.GT.4.AND.TIME.LE.5.AND.FLAGMED.EQ.2) CLFLAGMED = ( 1 + THETA(7))
IF(TIME.GT.5.AND.TIME.LE.6.AND.FLAGMED.EQ.2) CLFLAGMED = ( 1 + THETA(8))
IF(TIME.GT.6.AND.TIME.LE.7.AND.FLAGMED.EQ.2) CLFLAGMED = ( 1 + THETA(9))
IF(TIME.GT.7.AND.TIME.LE.8.AND.FLAGMED.EQ.2) CLFLAGMED = ( 1 + THETA(10))
IF(TIME.GT.8.AND.FLAGMED.EQ.2) CLFLAGMED = 1

;[B] Rifampicin
IF(TIME.LE.24.AND.FLAGMED.EQ.3) CLFLAGMED = 1
IF(TIME.GT.24.AND.TIME.LE.26.AND.FLAGMED.EQ.3) CLFLAGMED = ( 1 + THETA(11))
IF(TIME.GT.26.AND.TIME.LE.28.AND.FLAGMED.EQ.3) CLFLAGMED = ( 1 + THETA(12))
IF(TIME.GT.28.AND.TIME.LE.30.AND.FLAGMED.EQ.3) CLFLAGMED = ( 1 + THETA(13))
IF(TIME.GT.30.AND.TIME.LE.32.AND.FLAGMED.EQ.3) CLFLAGMED = ( 1 + THETA(14))
IF(TIME.GT.32.AND.FLAGMED.EQ.3) CLFLAGMED = ( 1 + THETA(15))

;[C] Voriconazole oral
IF(TIME.GT.2.AND.TIME.LE.3.AND.FLAGMED.EQ.4) CLFLAGMED = ( 1 + THETA(16))
```

@ Clin Pharmacokin

```
IF(TIME.GT.3.AND.TIME.LE.4.AND.FLAGMED.EQ.4) CLFLAGMED = ( 1 + THETA(17))
IF(TIME.GT.4.AND.TIME.LE.5.AND.FLAGMED.EQ.4) CLFLAGMED = ( 1 + THETA(18))
IF(TIME.GT.5.AND.TIME.LE.6.AND.FLAGMED.EQ.4) CLFLAGMED = ( 1 + THETA(19))
IF(TIME.GT.6.AND.TIME.LE.7.AND.FLAGMED.EQ.4) CLFLAGMED = ( 1 + THETA(20))
IF(TIME.GT.7.AND.TIME.LE.8.AND.FLAGMED.EQ.4) CLFLAGMED = ( 1 + THETA(21))
IF(TIME.GT.8.AND.TIME.LE.9.AND.FLAGMED.EQ.4) CLFLAGMED = ( 1 + THETA(22))
IF(TIME.GT.9.AND.FLAGMED.EQ.4) CLFLAGMED = ( 1 + THETA(23))
```

```
:[D] Voriconazole i.v
```

```
IF(TIME.GT.2.AND.TIME.LE.3.AND.FLAGMED.EQ.5) CLFLAGMED = ( 1 + THETA(24))
IF(TIME.GT.3.AND.TIME.LE.5.AND.FLAGMED.EQ.5) CLFLAGMED = ( 1 + THETA(25))
IF(TIME.GT.5.AND.TIME.LE.6.AND.FLAGMED.EQ.5) CLFLAGMED = ( 1 + THETA(26))
IF(TIME.GT.6.AND.TIME.LE.7.AND.FLAGMED.EQ.5) CLFLAGMED = ( 1 + THETA(27))
IF(TIME.GT.7.AND.TIME.LE.8.AND.FLAGMED.EQ.5) CLFLAGMED = ( 1 + THETA(28))
IF(TIME.GT.8.AND.TIME.LE.9.AND.FLAGMED.EQ.5) CLFLAGMED = ( 1 + THETA(29))
IF(TIME.GT.9.AND.FLAGMED.EQ.5) CLFLAGMED = ( 1 + THETA(30))
```

```
;-----
```

```
; Parent (MDZ)
```

```
;-----
```

```
; Parent clearance
```

```
TVCL = THETA(1) * CLFLAGMED
```

```
CL = TVCL * EXP(ETA(1))
```

```
; Parent volume of distribution
```

```
TVV1 = THETA(2)
```

```
V1 = TVV1 * EXP(ETA(2))
```

```
;-----
```

```
; Metabolite (1'-OH-MDZ)
```

```
;-----
```

```
; Metabolite clearance
```

```
TVCLM = THETA(3)
```

```
CLM = TVCLM * EXP(ETA(3))
```

```
; Metabolite volume of distribution
```

```
TVV2 = THETA(4)
```

```
V2 = TVV2 * EXP(ETA(4))
```

```
;Fraction metabolized
```

```
FMET = THETA(5)
```

```
S1 = V1/1000 ; change from mL to L
```

```
S2 = V2/1000
```

```
;-----Rate constants-----
```

```
k10 = (1-FMET) * CL/V1
```

```
K12 = FMET * CL/V1
```

```
K20 = CLM/V2
```

```
$DES
```

```
DADT(1) = -K10*A(1)-K12*A(1)
```

@ Clin Pharmacokin

```
DADT(2) = K12*A(1)*(341.77/325.78)-K20*A(2) ;(341.77/325.78)
; metabolite/parent ratio
```

\$ERROR

```
IF(CMT.EQ.1) IPRED = A(1)/S1
```

```
IF(CMT.EQ.2) IPRED = A(2)/S2
```

;Proportional RUV

```
W = IPRED
```

```
Y1 = IPRED + W*EPS(1) ;parent
```

```
Y2 = IPRED + W*EPS(2) ;metabolite
```

```
IF(CMT.EQ.1) TYPE=0 ;parent
```

```
IF(CMT.EQ.2) TYPE=1 ;metabolite
```

```
Y = Y2*TYPE + Y1*(1-TYPE)
```

```
IRES = DV-IPRED
```

```
DEL = 0
```

```
IF(IPRED.EQ.0)DEL = 0.0001
```

```
IWRES = IRES/(W+DEL)
```

;-----Initial estimates-----

```
$THETA (0,44) ;1. CL_parent [L/h]
```

```
$THETA (0.0001,56) ;2. V_parent [L]
```

```
$THETA (0,240) ;3. CL_metabolite [L/h]
```

```
$THETA (0.001,286) ;4. V2_metabolite [L]
```

```
$THETA 0.92 FIX ;5. Fraction metabolised
```

;A. cov efavirenz-CLFLAGMED2

```
(0,0.15) ; CLFLAGMED2 2-4
```

```
(0,0.59) ; CLFLAGMED2 4-5
```

```
(0,0.54) ; CLFLAGMED2 5-6
```

```
(0,0.28) ; CLFLAGMED2 6-7
```

```
(0,0.33) ; CLFLAGMED2 7-8
```

;B. cov rifampicin-CLFLAGMED3

```
(0,0.27) ; CLFLAGMED3 24-26
```

```
(0,0.17) ; CLFLAGMED3 26-28
```

```
(0,0.23) ; CLFLAGMED3 28-30
```

```
(0,0.46) ; CLFLAGMED3 30-32
```

```
(0,0.1) ; CLFLAGMED3 32-36
```

;C. cov voriconazole oral-CLFLAGMED4

```
(-1,-0.4,0) ; CLFLAGMED4 2-3
```

```
(-1,-0.3,0) ; CLFLAGMED4 3-4
```

```
(-1,-0.23,0) ; CLFLAGMED4 4-5
```

```
(-1,-0.32,0) ; CLFLAGMED4 5-6
```

```
(-1,-0.64,0) ; CLFLAGMED4 6-7
```

```
(-1,-0.54,0) ; CLFLAGMED4 7-8
```

```
(-1,-0.70,0) ; CLFLAGMED4 8-9
```

```
(-1,-0.7,0) ; CLFLAGMED4 9-10
```

@ Clin Pharmacokin

```
;D. cov voriconazole i.v-CLFLAGMED5  
(-1,-0.16,0) ; CLFLAGMED5 2-3  
(-1,-0.11,0) ; CLFLAGMED5 3-5  
(-1,-0.15,0) ; CLFLAGMED5 5-6  
(-1,-0.36,0) ; CLFLAGMED5 6-7  
(-1,-0.39,0) ; CLFLAGMED5 7-8  
(-1,-0.6,0) ; CLFLAGMED5 8-9  
(-1,-0.58,0) ; CLFLAGMED5 9-10
```

```
$OMEGA 0.04 ; IIV_CL_parent  
$OMEGA 0.09 ; IIV_V_parent  
$OMEGA 0.18 ; IIV_CL_metabolite  
$OMEGA 0.15 ; IIV_V2_metabolite
```

```
$$SIGMA 0.02 ; 1. Parent Prop RUV  
$SIGMA 0.05 ; 2. Metabolite Prop RUV
```

```
$ESTIMATION METHOD=1 INTERACTION MAXEVAL=9999 SIG=3 NOABORT PRINT=5
```

```
$COV
```
